# Supplementary material for: Synaptonemal complex protein 3 is associated with lymphangiogenesis in non-small cell lung cancer patients with lymph node metastasis
Source: PubMed Central journal article supplement (PMC5473978; doi:10.1186/s12967-017-1241-5), 2017-06-17
Supplement: 12967_2017_1241_MOESM1_ESM.pdf [file 12967_2017_1241_MOESM1_ESM.pdf]

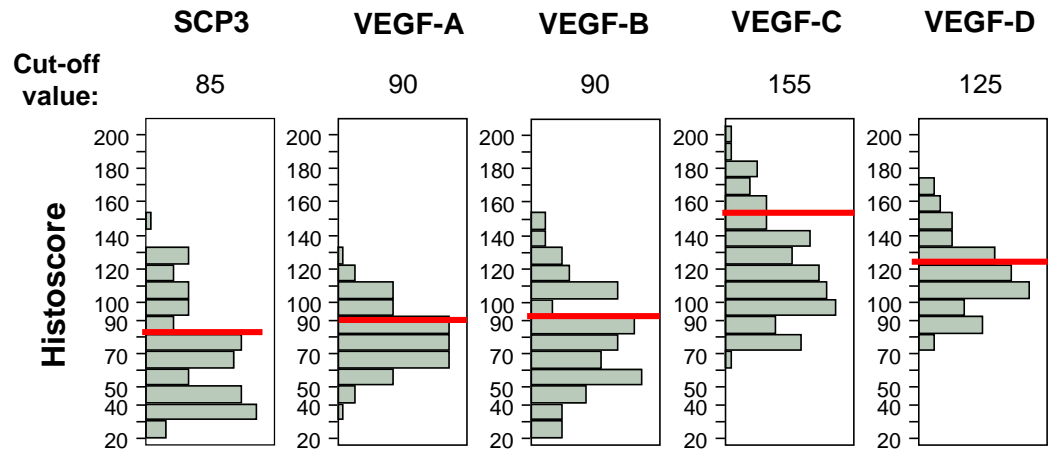

**Figure S1**
