# Supplementary material for: Synaptonemal complex protein 3 is associated with lymphangiogenesis in non-small cell lung cancer patients with lymph node metastasis
Source: Springer Nature journal article supplement (doi:10.1186/s12967-017-1241-5), 2017-06-17
Supplement: MOESM2 [file 12451430]

**Supplementary table S1 Clinicopathological characteristics of patients (n = 89)**

| <i>Variable</i>         | <i>Case No. (%)</i> |
|-------------------------|---------------------|
| Gender                  |                     |
| Male                    | 64 (71.9)           |
| Female                  | 25 (28.1)           |
| Stage                   |                     |
| I                       | --                  |
| II                      | 40 (44.9)           |
| III                     | 47 (52.8)           |
| IV                      | 2 (2.3)             |
| T Stage                 |                     |
| T1                      | 15 (16.9)           |
| T2-4                    | 74 (83.1)           |
| N Status                |                     |
| pN1                     | 46 (51.7)           |
| pN2-3                   | 43 (48.3)           |
| Tumor type              |                     |
| Adenocarcinoma          | 53 (59.6)           |
| Squamous cell carcinoma | 36 (40.4)           |
